# Supplementary material for: Calix[4]arene based dendrimersElectronic supplementary information (ESI) available: 1H NMR and UV-Vis spectra and data analysis. See http://www.rsc.org/suppdata/cc/b2/b202315f/
Source: Royal Society of Chemistry journal article supplement (doi:10.1039/b202315f), 2002-05-07
Supplement: b202315fc.doc [file b202315fc.doc]

# Supplementary data

**Data analysis**

Data analysis was carried out with the XDS program.7 The structure was solved using direct methods with the Shelx86 program.8 The asymmetric unit contains several solvent molecules, viz two acetones with full occupancy together with two water molecules and two ethanol molecules all with 50% occupancy. One of the methyl groups was disordered over two positions, each given 50% occupancy. Apart from the solvent molecules and these disordered atoms. All non-hydrogen atoms were refined with anisotropic thermal parameters. The hydrogen atoms were included in geometric positions and given thermal parameters equivalent to 1.2 times those of the atom to which they were attached. The structure was refined on F2 using Shelx1.9

7. W. Kabsch. J. Appl Cryst. 1988, 21, 916.

8. Shelx 86, G. M. Sheldrick Acta. Cryst. 1990, A46, 467.

9. Shelxl 86, G. M. Sheldrick. 1993, program for crystal structure refinement, University of Göttingen.
